# Supplementary material for: Morphology, Carbohydrate Composition and Vernalization Response in a Genetically Diverse Collection of Asian and European Turnips (Brassica rapa subsp. rapa)
Source: PubMed Central journal article supplement (PMC4256417; doi:10.1371/journal.pone.0114241), 2014-12-04
Supplement: pone.0114241.s013.pdf [file pone.0114241.s013.pdf]

**Table S6 Results of analysis of variance (ANOVA) for each trait in five experiments.**

The presented traits are leaf color (LC), leaf length (LL), lamina blade length (LBL), lamina blade width (LBW), leaf index (LI), petiole width (PW), leaf lobe (LB), leaf lobelets (LBs), leaf edge shape (LES), leaf blade shape outline (LS), leaf division (LD), leaf a leaf hairiness (LH), leaf lamina attitude (LAT), leaf and stem weight (Lwe), flowering time (FT), tuber length (TL), tuber width (Twi), tuber shape (TS), tuber color (TC), tuber shoots number (Tsh), tuber weight (Twe), tuber dry weight (TDW), tuber surface smoothness (Tss), tuber swelling onset (Tso), tuber growing depth (Tgd) and tuber dry mass% (TDM).

| Experiment        | Traits          | Sum of Squares | df     | Mean Square | F     | Sig. |
|-------------------|-----------------|----------------|--------|-------------|-------|------|
| Experiment 2008F* | LL * Accession  | 6468.105       | 40     | 119.780     | 3.150 | .000 |
|                   | Between Groups  |                |        |             |       |      |
|                   | Within Groups   | 4183.136       | 87     | 38.029      |       |      |
|                   | Total           | 10651.241      | 127    |             |       |      |
|                   | LBW * Accession | 1843.758       | 40     | 34.144      | 2.527 | .000 |
|                   | Between Groups  |                |        |             |       |      |
|                   | Within Groups   | 1486.076       | 87     | 13.510      |       |      |
|                   | Total           | 3329.834       | 127    |             |       |      |
|                   | LLL * Accession | 5861.047       | 40     | 108.538     | 3.116 | .000 |
|                   | Between Groups  |                |        |             |       |      |
|                   | Within Groups   | 3831.896       | 87     | 34.835      |       |      |
|                   | Total           | 9692.943       | 127    |             |       |      |
|                   | LI * Accession  | 22.228         | 40     | .412        | 1.821 | .004 |
|                   | Between Groups  |                |        |             |       |      |
|                   | Within Groups   | 24.868         | 87     | .226        |       |      |
|                   | Total           | 47.097         | 127    |             |       |      |
|                   | PW * Accession  | 10.024         | 40     | .186        | 1.741 | .007 |
|                   | Between Groups  |                |        |             |       |      |
|                   | Within Groups   | 11.732         | 87     | .107        |       |      |
|                   | Total           | 21.755         | 127    |             |       |      |
| LPL * Accession   | 1981.014        | 40             | 36.685 | 6.717       | .000  |      |
| Between Groups    |                 |                |        |             |       |      |
| Within Groups     | 600.767         | 87             | 5.462  |             |       |      |
| Total             | 2581.781        | 127            |        |             |       |      |
| LS * Accession    | 140.509         | 42             | 2.602  | 1.101       | .331  |      |
| Between Groups    |                 |                |        |             |       |      |
| Within Groups     | 260.000         | 123            | 2.364  |             |       |      |
| Total             | 400.509         | 165            |        |             |       |      |
| LDM * Accession   | 112.945         | 40             | 2.092  | 1.613       | .018  |      |
| Between Groups    |                 |                |        |             |       |      |
| Within Groups     | 142.667         | 87             | 1.297  |             |       |      |
| Total             | 255.612         | 127            |        |             |       |      |
| LDI * Accession   | 59.782          | 40             | 1.107  | 3.971       | .000  |      |
| Between Groups    |                 |                |        |             |       |      |
| Within Groups     | 30.667          | 87             | .279   |             |       |      |
| Total             | 90.448          | 127            |        |             |       |      |
| LB * Accession    | 997.903         | 42             | 18.480 | 5.082       | .000  |      |
| Between Groups    |                 |                |        |             |       |      |
| Within Groups     | 400.000         | 123            | 3.636  |             |       |      |
| Total             | 1397.903        | 165            |        |             |       |      |
| LAS * Accession   | 135.903         | 42             | 2.517  | 1.821       | .004  |      |
| Between Groups    |                 |                |        |             |       |      |
| Within Groups     | 152.000         | 123            | 1.382  |             |       |      |
| Total             | 287.903         | 165            |        |             |       |      |
| Twi * Accession   | 55702.9         | 40             | 1392.6 | 2.428       | .000  |      |
| Between Groups    |                 |                |        |             |       |      |
| Within Groups     | 49907.8         | 87             | 573.7  |             |       |      |
| Total             | 105610.7        | 127            |        |             |       |      |
| TL * Accession    | 247958.9        | 40             | 6199.0 | 9.516       | .000  |      |
| Between Groups    |                 |                |        |             |       |      |
| Within Groups     | 56677.0         | 87             | 651.5  |             |       |      |
| Total             | 304635.9        | 127            |        |             |       |      |
| TI * Accession    | 32.7            | 40             | .8     | 10.121      | .000  |      |
| Between Groups    |                 |                |        |             |       |      |
| Within Groups     | 7.0             | 87             | .1     |             |       |      |
| Total             | 39.7            | 127            |        |             |       |      |
| FT * Accession    | 84003.7         | 42             | 2000.1 | 16.954      | .000  |      |
| Between Groups    |                 |                |        |             |       |      |
| Within Groups     | 14510.3         | 123            | 118.0  |             |       |      |
| Total             | 98514.0         | 165            |        |             |       |      |

| Experiment         | Traits                    |                           | Sum of Squares | df       | Mean Square | F      | Sig. |
|--------------------|---------------------------|---------------------------|----------------|----------|-------------|--------|------|
| Experiment 2009F*  | FT *<br>Accession         | Between Groups (Combined) | 66610.4        | 42       | 1586.0      | 4163.2 | .000 |
|                    |                           | Within Groups             | 16.0           | 42       | .4          |        |      |
|                    |                           | Total                     | 66626.4        | 84       |             |        |      |
|                    | LC *<br>Accession         | Between Groups (Combined) | 1887.2         | 42       | 44.9        | 2.8    | .000 |
|                    |                           | Within Groups             | 3506.2         | 215      | 16.3        |        |      |
|                    |                           | Total                     | 5393.5         | 257      |             |        |      |
|                    | Twe *<br>Accession        | Between Groups (Combined) | 26897269.3     | 38       | 707822.9    | 2.4    | .002 |
| Within Groups      |                           | 14376644.5                | 49             | 293400.9 |             |        |      |
| Total              |                           | 41273913.8                | 87             |          |             |        |      |
| TL *<br>Accession  | Between Groups (Combined) | 239586.1                  | 41             | 5843.6   | 15.1        | .000   |      |
|                    | Within Groups             | 19728.5                   | 51             | 386.8    |             |        |      |
|                    | Total                     | 259314.6                  | 92             |          |             |        |      |
| Twi *<br>Accession | Between Groups (Combined) | 104434.1                  | 41             | 2547.2   | 5.4         | .000   |      |
|                    | Within Groups             | 24277.2                   | 51             | 476.0    |             |        |      |
|                    | Total                     | 128711.3                  | 92             |          |             |        |      |
| Tsh *<br>Accession | Between Groups (Combined) | 1406.4                    | 41             | 34.3     | 5.6         | .000   |      |
|                    | Within Groups             | 413.9                     | 67             | 6.2      |             |        |      |
|                    | Total                     | 1820.3                    | 108            |          |             |        |      |
| TI * Accession     | Between Groups (Combined) | 20.4                      | 41             | .5       | 12.5        | .000   |      |
|                    | Within Groups             | 2.0                       | 51             | .0       |             |        |      |
|                    | Total                     | 22.4                      | 92             |          |             |        |      |
| Experiment 2010G*  | Twe *<br>Accession        | Between Groups (Combined) | 3465986        | 39       | 88871.4     | 3.954  | .000 |
|                    |                           | Within Groups             | 2247674        | 100      | 22476.7     |        |      |
|                    |                           | Total                     | 5713660        | 139      |             |        |      |
|                    | Twi *<br>Accession        | Between Groups (Combined) | 91813          | 39       | 2354.2      | 4.982  | .000 |
|                    |                           | Within Groups             | 47257          | 100      | 472.6       |        |      |
|                    |                           | Total                     | 139070         | 139      |             |        |      |
|                    | Tsh *<br>Accession        | Between Groups (Combined) | 247            | 39       | 6.3         | 10.517 | .000 |
|                    |                           | Within Groups             | 61             | 101      | .6          |        |      |
|                    |                           | Total                     | 308            | 140      |             |        |      |
|                    | Tgd *<br>Accession        | Between Groups (Combined) | 33             | 39       | .8          | 7.061  | .000 |
|                    |                           | Within Groups             | 12             | 99       | .1          |        |      |
|                    |                           | Total                     | 44             | 138      |             |        |      |
|                    | Tss *<br>Accession        | Between Groups (Combined) | 39             | 39       | 1.0         | 3.545  | .000 |
|                    |                           | Within Groups             | 28             | 99       | .3          |        |      |
|                    |                           | Total                     | 67             | 138      |             |        |      |
|                    | Tso *<br>Accession        | Between Groups (Combined) | 4163           | 40       | 104.1       | 6.077  | .000 |
|                    |                           | Within Groups             | 1884           | 110      | 17.1        |        |      |
|                    |                           | Total                     | 6047           | 150      |             |        |      |
|                    | FT *<br>Accession         | Between Groups (Combined) | 91305          | 40       | 2282.6      | 6.777  | .000 |
|                    |                           | Within Groups             | 38397          | 114      | 336.8       |        |      |
| Total              |                           | 129702                    | 154            |          |             |        |      |
| LBL *<br>Accession | Between Groups (Combined) | 983                       | 40             | 24.6     | 3.863       | .000   |      |
|                    | Within Groups             | 458                       | 72             | 6.4      |             |        |      |
|                    | Total                     | 1441                      | 112            |          |             |        |      |
| LBW *<br>Accession | Between Groups (Combined) | 251                       | 40             | 6.3      | 2.267       | .001   |      |
|                    | Within Groups             | 199                       | 72             | 2.8      |             |        |      |
|                    | Total                     | 450                       | 112            |          |             |        |      |
| LI * Accession     | Between Groups (Combined) | 11                        | 40             | .3       | 5.876       | .000   |      |
|                    | Within Groups             | 3                         | 72             | .0       |             |        |      |
|                    | Total                     | 14                        | 112            |          |             |        |      |
| Lwe *<br>Accession | Between Groups (Combined) | 5124263                   | 39             | 131391.4 | 13.128      | .000   |      |
|                    | Within Groups             | 980860                    | 98             | 10008.8  |             |        |      |
|                    | Total                     | 6105123                   | 137            |          |             |        |      |
| LC *<br>Accession  | Between Groups (Combined) | 1084                      | 40             | 27.1     | 2.655       | .000   |      |
|                    | Within Groups             | 766                       | 75             | 10.2     |             |        |      |
|                    | Total                     | 1849                      | 115            |          |             |        |      |
| PW *<br>Accession  | Between Groups (Combined) | 366                       | 40             | 9.1      | 2.089       | .003   |      |
|                    | Within Groups             | 324                       | 74             | 4.4      |             |        |      |
|                    | Total                     | 690                       | 114            |          |             |        |      |
| LES *<br>Accession | Between Groups (Combined) | 68                        | 40             | 1.7      | 2.533       | .000   |      |
|                    | Within Groups             | 50                        | 75             | .7       |             |        |      |
|                    | Total                     | 118                       | 115            |          |             |        |      |
| LAT *<br>Accession | Between Groups (Combined) | 33                        | 40             | .8       | 1.011       | .473   |      |
|                    | Within Groups             | 61                        | 75             | .8       |             |        |      |
|                    | Total                     | 94                        | 115            |          |             |        |      |

| Experiment         | Traits                                    |                           | Sum of Squares | df      | Mean Square | F      | Sig. |
|--------------------|-------------------------------------------|---------------------------|----------------|---------|-------------|--------|------|
| Experiment 2011F*  | Turnip width (mm) *<br>Accession          | Between Groups (Combined) | 144622.795     | 28      | 5165.100    | 9.889  | .000 |
|                    |                                           | Within Groups             | 120127.352     | 230     | 522.293     |        |      |
|                    |                                           | Total                     | 264750.147     | 258     |             |        |      |
|                    | Turnip length (mm) *<br>Accession         | Between Groups (Combined) | 362676.486     | 28      | 12952.732   | 24.141 | .000 |
|                    |                                           | Within Groups             | 123405.290     | 230     | 536.545     |        |      |
|                    |                                           | Total                     | 486081.776     | 258     |             |        |      |
|                    | Nr.shoots (tillers) *<br>Accession        | Between Groups (Combined) | 1078.256       | 28      | 38.509      | 10.094 | .000 |
|                    |                                           | Within Groups             | 877.443        | 230     | 3.815       |        |      |
|                    |                                           | Total                     | 1955.699       | 258     |             |        |      |
|                    | shape index (width/length) *<br>Accession | Between Groups (Combined) | 57.043         | 28      | 2.037       | 33.637 | .000 |
|                    |                                           | Within Groups             | 13.930         | 230     | .061        |        |      |
|                    |                                           | Total                     | 70.972         | 258     |             |        |      |
| Experiment 2012F*  | Twi *<br>Accession                        | Between Groups (Combined) | 37302.413      | 54      | 690.785     | 1.569  | .024 |
|                    |                                           | Within Groups             | 48432.497      | 110     | 440.295     |        |      |
|                    |                                           | Total                     | 85734.910      | 164     |             |        |      |
|                    | TL *<br>Accession                         | Between Groups (Combined) | 68296.485      | 54      | 1264.750    | 2.858  | .000 |
|                    |                                           | Within Groups             | 48682.900      | 110     | 442.572     |        |      |
|                    |                                           | Total                     | 116979.384     | 164     |             |        |      |
|                    | TI * Accession                            | Between Groups (Combined) | 26.937         | 54      | .499        | 2.985  | .000 |
|                    |                                           | Within Groups             | 18.383         | 110     | .167        |        |      |
|                    |                                           | Total                     | 45.320         | 164     |             |        |      |
|                    | Brix *<br>Accession                       | Between Groups (Combined) | 223.392        | 54      | 4.137       | 3.344  | .000 |
|                    |                                           | Within Groups             | 136.100        | 110     | 1.237       |        |      |
|                    |                                           | Total                     | 359.492        | 164     |             |        |      |
|                    | Drymass *<br>Accession                    | Between Groups (Combined) | 1197.114       | 54      | 22.169      | 7.450  | .000 |
|                    |                                           | Within Groups             | 327.327        | 110     | 2.976       |        |      |
|                    |                                           | Total                     | 1524.441       | 164     |             |        |      |
|                    | Twe *<br>Accession                        | Between Groups (Combined) | 1601339.539    | 54      | 29654.436   | 3.574  | .000 |
|                    |                                           | Within Groups             | 912701.340     | 110     | 8297.285    |        |      |
|                    |                                           | Total                     | 2514040.879    | 164     |             |        |      |
| TDW *<br>Accession | Between Groups (Combined)                 | 7376.599                  | 54             | 136.604 | 2.914       | .000   |      |
|                    | Within Groups                             | 5157.193                  | 110            | 46.884  |             |        |      |
|                    | Total                                     | 12533.792                 | 164            |         |             |        |      |

\*Experiment code "2008F, 2009F, 2011F and 2012F" stand for four field experiments carried out between 2008 and 2012. Code "2010G" means the greenhouse experiment in 2010.
